# Supplementary material
Source: PubMed Central journal article supplement (PMC3836238)
Supplement: NIHMS34234-supplement-Supp1.pdf [file NIHMS34234-supplement-Supp1.pdf]

## Supplemental Material

### Supplementary Figures

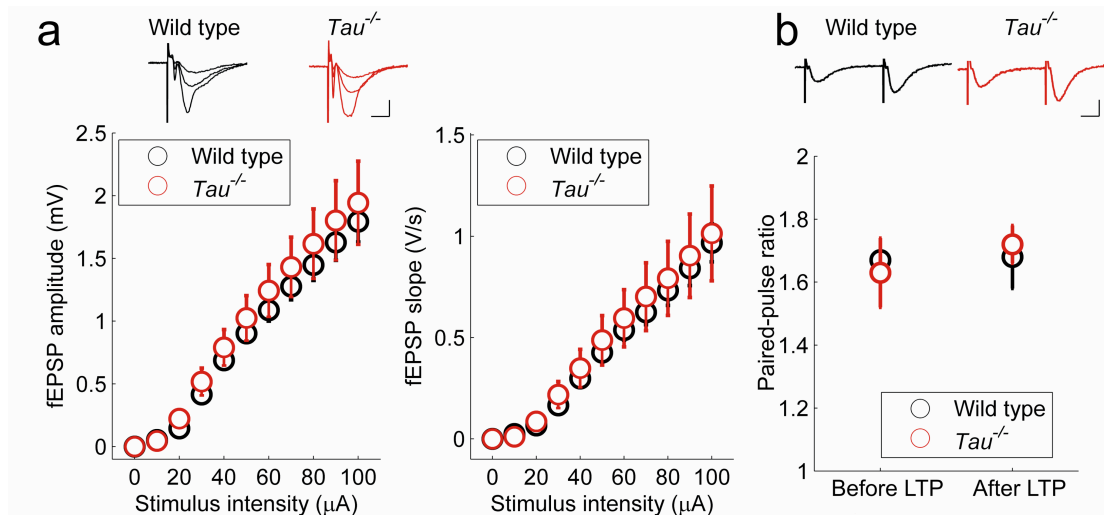

**Supplementary Figure 1. Wild-type and  $Tau^{-/-}$  mice have similar synaptic input-output relationships and paired-pulse ratios.** (a) Left panel: fEPSP amplitude for WT (black) and  $Tau^{-/-}$  mice (red); right panel: fEPSP slope for WT and  $Tau^{-/-}$  mice. Inset, example traces corresponding to 20, 60 and 100  $\mu$ A stimulation. RM ANOVA, with genotype as the between-subjects factor and stimulus intensity as the within-subjects factor, revealed no effect of genotype (fEPSP amplitude  $F_{1,36} = 0.33$ ;  $P = 0.57$ ; fEPSP slope:  $F_{1,36} = 0.19$ ;  $P = 0.66$ ; WT  $N = 18$   $Tau^{-/-}$   $N = 20$ ). (b) Paired-pulse ratio for WT ( $N = 12$ ; black) and  $Tau^{-/-}$  mice ( $N = 10$ ; red), before and after LTP induction. Inset shows example traces for paired-pulse responses before LTP. Scale bars: 5 ms, 500  $\mu$ V.

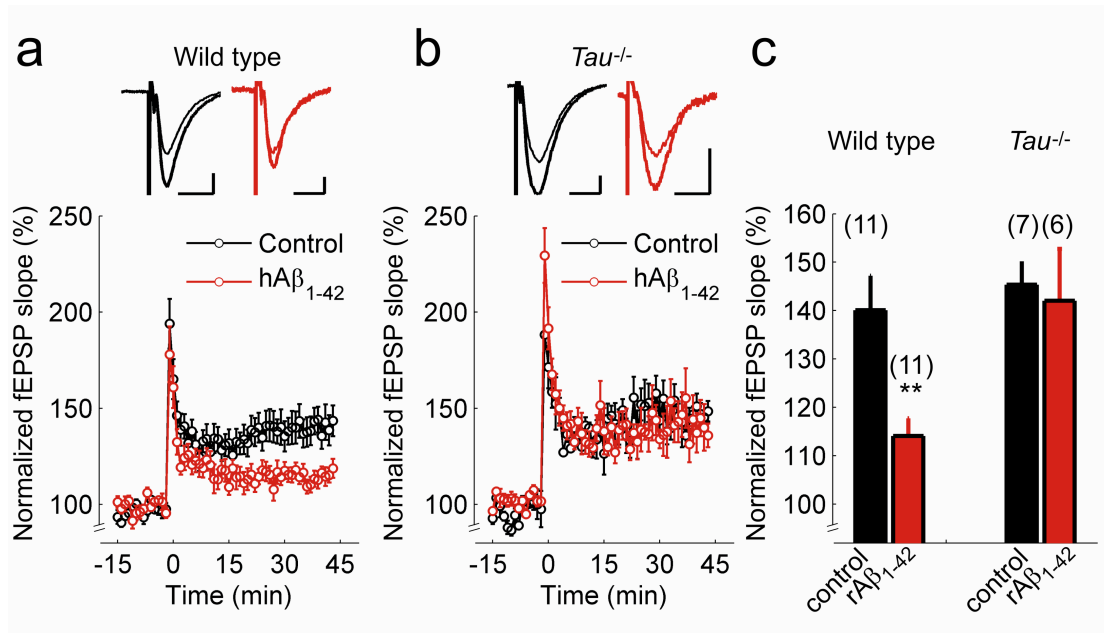

**Supplementary Figure 2. Human Aβ<sub>1-42</sub> fails to reduce LTP in disinhibited slices of *Tau<sup>-/-</sup>* mice.** (a, b) Hippocampal Schaffer collateral-CA1 LTP in slices from wild-type (a) and *Tau<sup>-/-</sup>* mice (b) in the presence of 100 nM gabazine in control ACSF (black) or after pre-incubation in hAβ<sub>1-42</sub> (red). The insets show superimposed example traces before and 40 min after high-frequency stimulation for each condition. Scale bars: 5 ms, 200 μV. (c) Summary of results 40-45 min after high-frequency stimulation. Error bars are s.e.m. ANOVA  $F_{1,34} = 5.04$  \*\*  $P < 0.01$ . The numbers of slices are shown in parentheses.

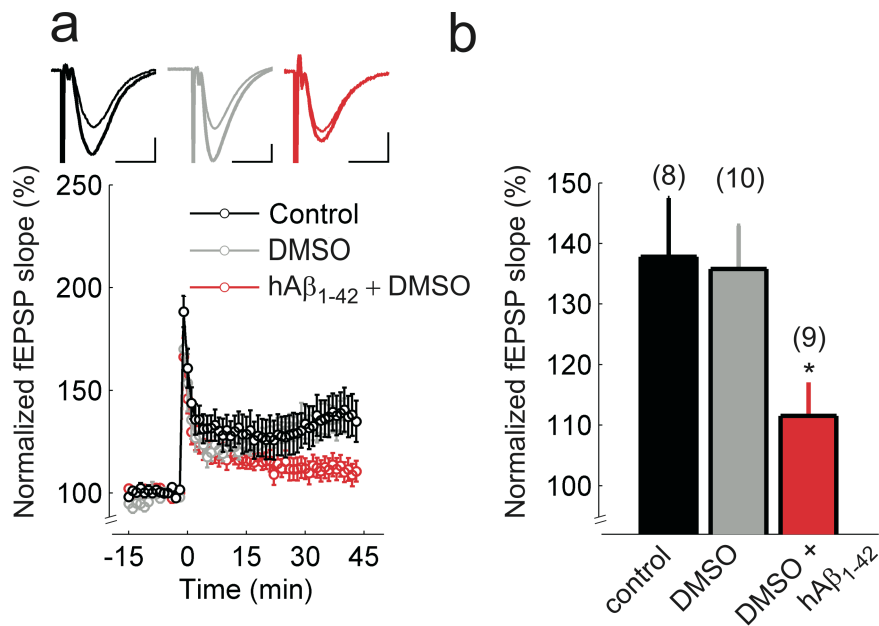

**Supplementary Figure 3. DMSO treatment does not affect LTP results in control and human Aβ<sub>1-42</sub>-treated slices.** (a) Hippocampal Schaffer collateral-CA1 LTP in wild-type mice in control ACSF (black), or after incubation with 0.01% DMSO alone (gray) or 0.01% DMSO + hAβ<sub>1-42</sub> (red). The insets show superimposed example traces before and 40 min after high-frequency stimulation for each condition. Scale bars: 5 ms, 200 μV. (b) Summary of results 35-40 min after high-frequency stimulation. Error bars are s.e.m. ANOVA  $F_{2,26} = 3.87$  \*  $P < 0.05$ . The numbers of slices are shown in parentheses.
